# Supplementary material
Source: Springer Nature journal article supplement (https://www.springermedizin.de/resource/supplementary/12990_2010_273_MOESM3_ESM.pdf/9612924)

# CFA, WDR neurons

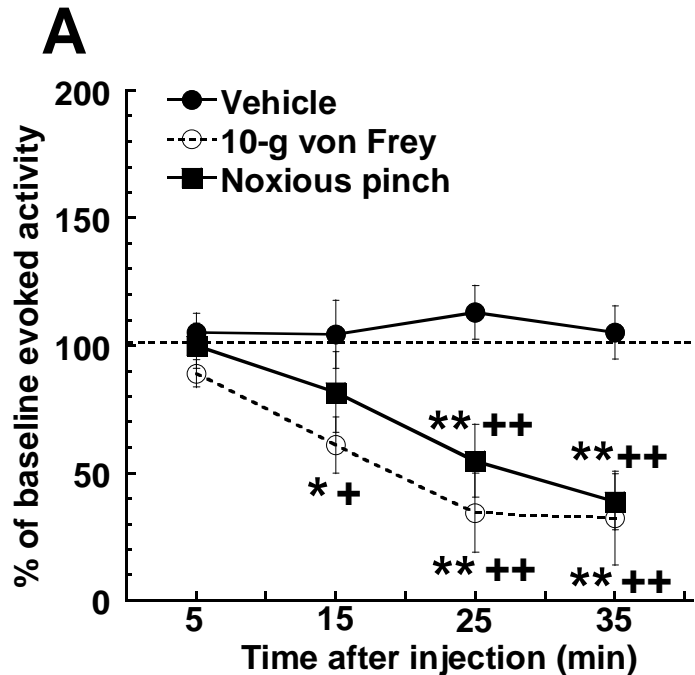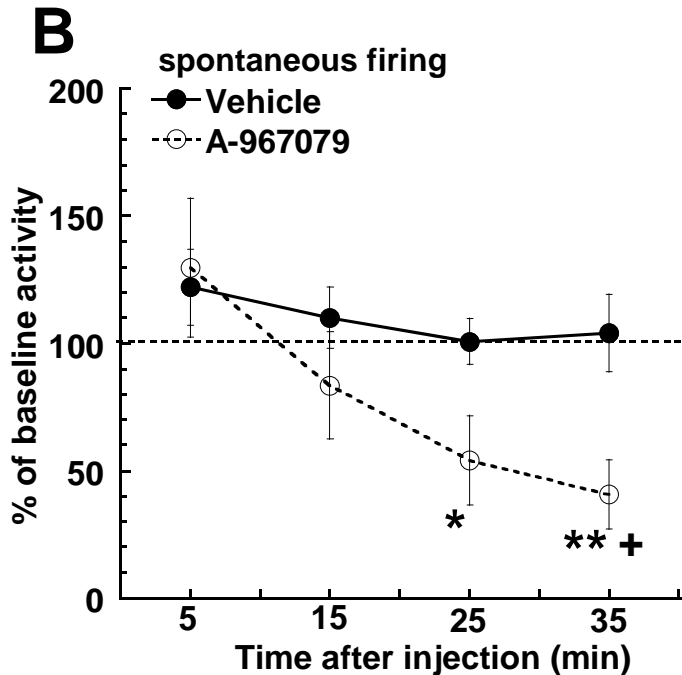

Supplement: MOESM3 [file 9612924]
